# Supplementary material for: Metal-Organic Decomposition-Mediated Nanoparticulate Vanadium Oxide Hole Transporting Buffer Layer for Polymer Bulk-Heterojunction Solar Cells
Source: MDPI journal article supplement (doi:10.3390/polym12081791), 2020-08-10
Supplement: s1 [file s1]

Supplementary Information

# Metal-Organic Decomposition-Mediated Nanoparticulate Vanadium Oxide Hole Transporting Buffer Layer for Polymer Bulk-heterojunction Solar Cells

Chengkai Xia, Won Tae Hong, Young Eun Kim, Woo-Seok Choe, Dong-Hwan Kim \* and Jung Kyu Kim \*

School of Chemical Engineering, Sungkyunkwan University (SKKU), Suwon 16419, Korea

\* Correspondence: dhkim1@skku.edu (D.H.K.); legkim@skku.edu (J.K.K.); Tel.: +82-31-299-4717 (D.H.K.); +82-31-290-7254 (J.K.K.)

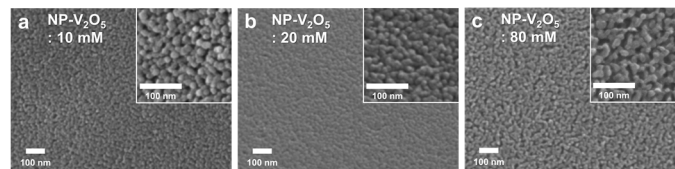

**Figure S1.** SEM images of NP-V<sub>2</sub>O<sub>5</sub> films prepared by using various concentrations of PEG (a) 10 mM, (b) 20 mM, and (c) 80 mM.

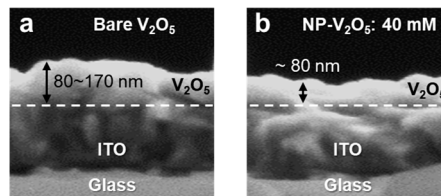

**Figure S2.** Cross-section SEM images of (a) bare V<sub>2</sub>O<sub>5</sub> and (b) NP-V<sub>2</sub>O<sub>5</sub> prepared using 40 mM PEG.

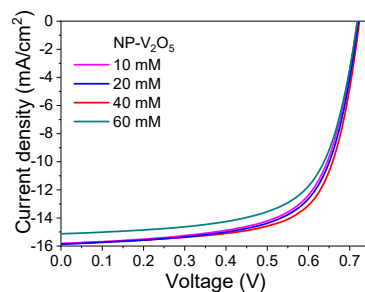

**Figure S3.** Photocurrent density–voltage curves of the OSCs with NP-V<sub>2</sub>O<sub>5</sub> HTL prepared using various concentrations of PEG from 10 mM to 80 mM.

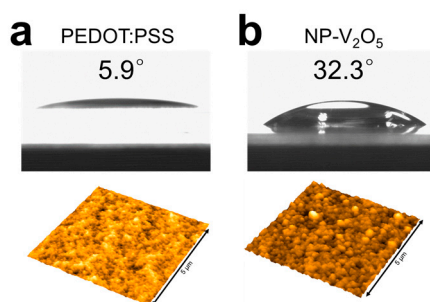

**Figure S4.** Contact angle and AFM images of water droplets (12  $\mu$ L) on the surface of (a) PEDOT:PSS and (b) NP-V<sub>2</sub>O<sub>5</sub> films prepared using 40 mM PEG.

**Table S1.** Summary of the device performance parameters.

| Devices <sup>a,b</sup>                          | $V_{oc}$ (V)            | $J_{sc}$ (mA/cm <sup>2</sup> ) | FF (%)                  | PCE (%)                |
|-------------------------------------------------|-------------------------|--------------------------------|-------------------------|------------------------|
| PEDOT:PSS                                       | 0.734<br>( $\pm 0.01$ ) | 14.95<br>( $\pm 0.02$ )        | 68.09<br>( $\pm 0.11$ ) | 7.47<br>( $\pm 0.09$ ) |
| Bare V <sub>2</sub> O <sub>5</sub>              | 0.562<br>( $\pm 0.54$ ) | 10.06<br>( $\pm 4.58$ )        | 20.70<br>( $\pm 9.24$ ) | 1.24<br>( $\pm 1.09$ ) |
| NP-V <sub>2</sub> O <sub>5</sub><br>(10 mM PEG) | 0.725<br>( $\pm 0.07$ ) | 15.79<br>( $\pm 0.04$ )        | 66.47<br>( $\pm 0.24$ ) | 7.55<br>( $\pm 0.22$ ) |
| NP-V <sub>2</sub> O <sub>5</sub><br>(20 mM PEG) | 0.723<br>( $\pm 0.04$ ) | 15.84<br>( $\pm 0.02$ )        | 67.12<br>( $\pm 0.18$ ) | 7.68<br>( $\pm 0.19$ ) |
| NP-V <sub>2</sub> O <sub>5</sub><br>(40 mM PEG) | 0.723<br>( $\pm 0.05$ ) | 15.81<br>( $\pm 0.03$ )        | 69.01<br>( $\pm 0.15$ ) | 7.89<br>( $\pm 0.11$ ) |
| NP-V <sub>2</sub> O <sub>5</sub><br>(80 mM PEG) | 0.717<br>( $\pm 0.13$ ) | 15.10<br>( $\pm 0.37$ )        | 66.04<br>( $\pm 0.41$ ) | 7.15<br>( $\pm 0.52$ ) |

<sup>a</sup> The cell area was determined by using an aperture of area 11.43 mm<sup>2</sup>. The aperture was placed on top of the cell (of approximately 15 mm<sup>2</sup>). These area values were carefully characterized with a video microscope (Sometch, SV-35). <sup>b</sup> The average values were obtained from 10 devices for each condition.
